# Supplementary material for: Influence of Protein Carbonylation on Human Adipose Tissue Dysfunction in Obesity and Insulin Resistance
Source: Biomedicines. 2022 Nov 24;10(12):3032. doi: 10.3390/biomedicines10123032 (PMC9775537; doi:10.3390/biomedicines10123032)
Supplement: Supplementary file 1 [file biomedicines-10-03032-s001.zip]

Archive with 4 entries (4 files):
- Figure S1.tiff
- Figure S2.tiff
- Supplementary Figures.pdf
- Supplementary Table.pdf
