# Supplementary material for: Influence of Protein Carbonylation on Human Adipose Tissue Dysfunction in Obesity and Insulin Resistance
Source: Biomedicines. 2022 Nov 24;10(12):3032. doi: 10.3390/biomedicines10123032 (PMC9775537; doi:10.3390/biomedicines10123032)
Supplement: Supplementary file 1 [file biomedicines-10-03032-s001.zip › Supplementary Table.pdf]

Supplementary Table 1. List of Antibodies.

| <b>Antibody</b>                | <b>Host specie</b> | <b>Reference</b> | <b>Commercial Source</b> | <b>Dilution</b> |
|--------------------------------|--------------------|------------------|--------------------------|-----------------|
| Anti-Dinitrophenyl-KLH (DNP)   | Rabbit             | A64535           | RD Systems               | 1:2500          |
| Anti-4HNE                      | Mouse              | MAB3249          | <i>RD system</i>         | 1:2000          |
| Anti-GSS                       | Rabbit             | ab290            | <i>Abcam</i>             | 1:1000          |
| Anti-SOD1                      | Rabbit             | ab45422          | <i>Abcam</i>             | 1:1000          |
| Anti-HA                        | Goat               | Sc-16147         | <i>Santa Cruz</i>        | 1:1000          |
| Anti-Rabbit IgG peroxidase     | Rabbit             | A8275            | <i>Sigma Aldrich</i>     | 1:2500          |
| Anti-Mouse IgG peroxidase      | Mouse              | A-9044           | <i>Sigma Aldrich</i>     | 1:2500          |
| Anti-Goat/Sheep IgG peroxidase | Goat               | A-9452           | <i>Sigma Aldrich</i>     | 1:2500          |
